# Supplementary material for: Bayesian Network Analysis for Shoreline Dynamics, Coastal Water Quality, and Their Related Risks in the Venice Littoral Zone, Italy
Source: MDPI journal article supplement (doi:10.3390/jmse12010139), 2024-01-10

Supplementary Material Table S1: List of the final selected variables and their states in BN model

| No. | Variable                           | Abbreviation | Unit               | Classes          |                    |                |              |              |
|-----|------------------------------------|--------------|--------------------|------------------|--------------------|----------------|--------------|--------------|
| I   | Parent nodes (drivers)             |              |                    |                  |                    |                |              |              |
| 1   | Sea surface height above the geoid | SSH          | m                  | (-Inf, -0.381]   | (0.381, -0.355]    | (-0.355, +Inf) |              |              |
| 2   | Eastward sea water velocity        | ESV          | m s <sup>-1</sup>  | (-Inf, -0.00525] | (-0.00525, 0.0228] | (0.0228, +Inf) |              |              |
| 3   | Northward sea water velocity       | NSV          | m s <sup>-1</sup>  | (-Inf, 0.000844] | (0.000844, 0.0617] | (0.0617, +Inf) |              |              |
| 4   | Wave direction from                | WAD          | degree             | [0, 104]         | (104, 114]         | (114, 360)     |              |              |
| 5   | Significant wave height            | WAH          | m                  | [0, 0.357]       | (0.357, 0.398]     | (0.398, +Inf)  |              |              |
| 6   | Maximum significant wave height    | MWAH         | m                  | [0, 3.51]        | (3.51, 5.03]       | (5.03, +Inf)   |              |              |
| 7   | Sea surface wave mean period       | WAP          | s                  | [0, 3.39]        | (3.39, 3.46]       | (3.46, +Inf)   |              |              |
| 8   | Significant wind wave height       | WIH          | m                  | [0, 0.201]       | (0.201, 0.235]     | (0.235, +Inf)  |              |              |
| 9   | Wind wave direction from           | WIH          | degree             | [0, 130]         | (130, 132]         | (132, 360)     |              |              |
| II  | Child nodes (assessment endpoints) |              |                    |                  |                    |                |              |              |
| 10  | Diffuse attenuation                | KD           | m <sup>-1</sup>    | (-Inf, 0.16)     | [0.16, 0.19)       | [0.19, 0.21)   | [0.21, 0.24) | [0.24, +Inf) |
| 11  | Suspended particulate matter       | SPM          | g m <sup>-3</sup>  | (-Inf, 6)        | [6, 8)             | [8, 10)        | [10, 12)     | [12, +Inf)   |
| 12  | Shoreline evolution                | SEV          | m yr <sup>-1</sup> | (-Inf, -10)      | [-10, -1)          | [-1, 1)        | [1, 10)      | [10, +Inf)   |

Supplementary Material Figure S1: Annual Net Shoreline Movement for the period 2015 – 2019

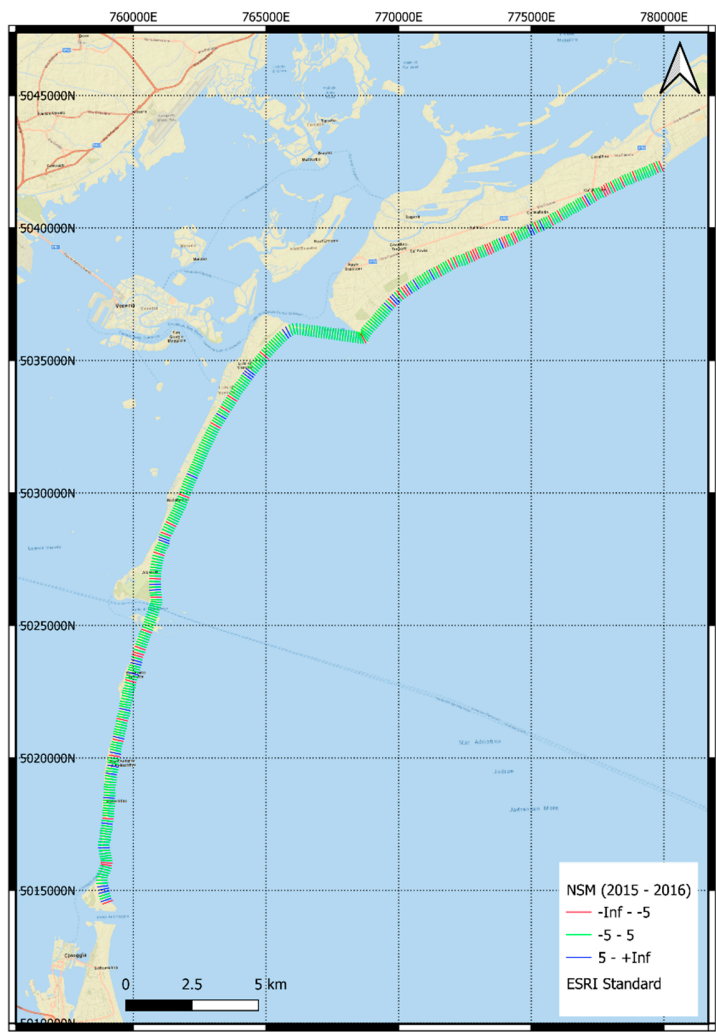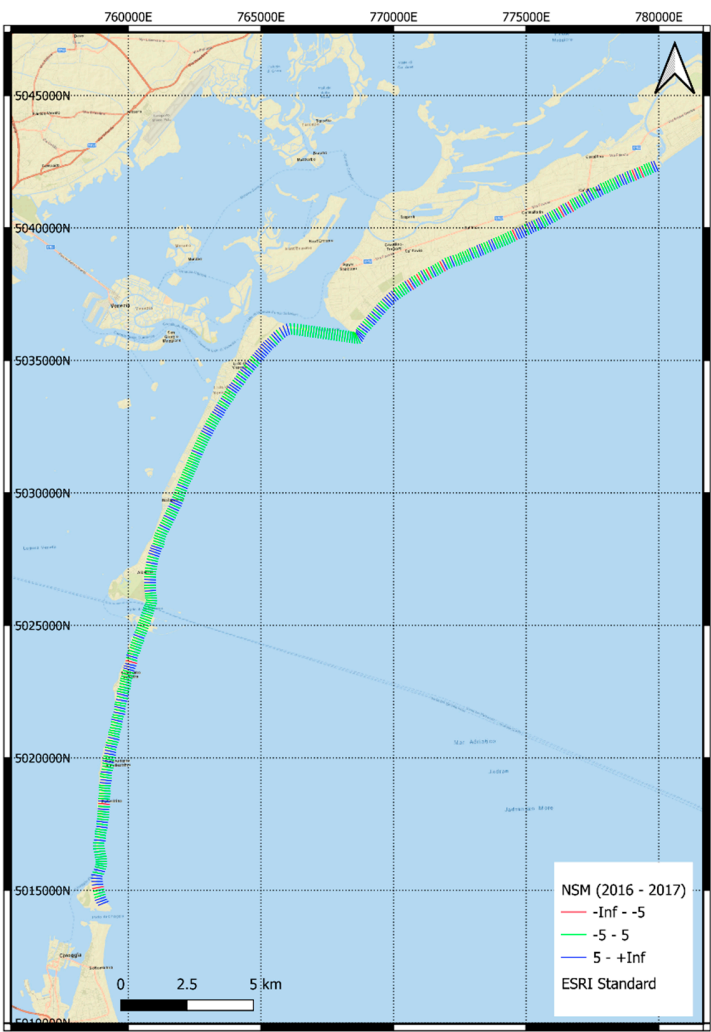

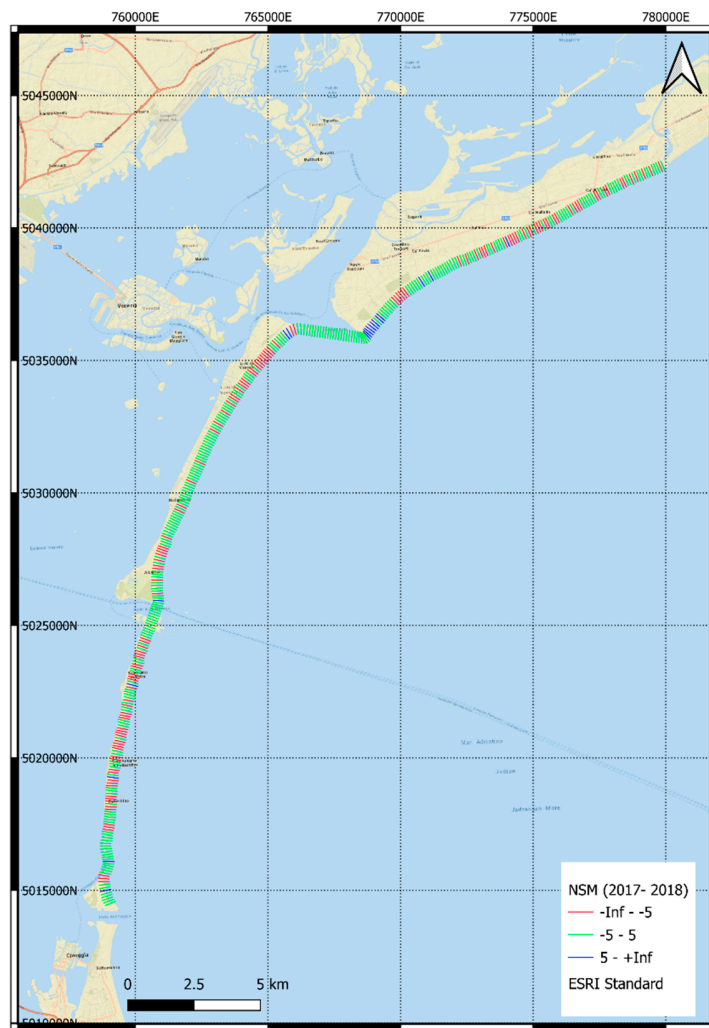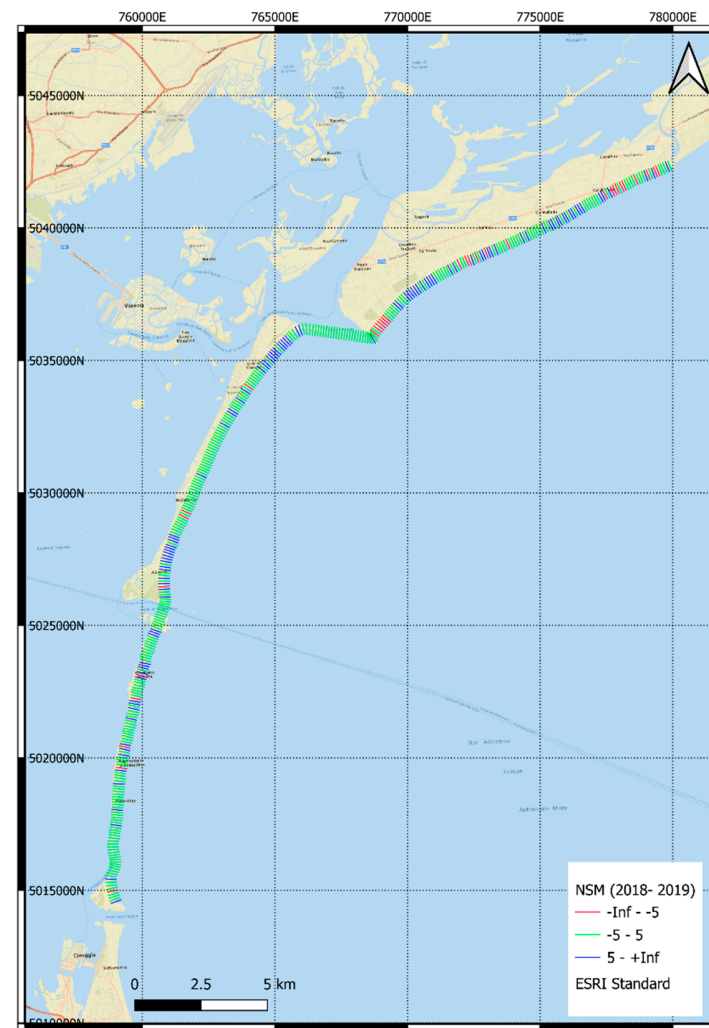

Supplement: s1 [file s1]
